# Supplementary material
Source: publisher figshare collection journal article supplement (https://frontiersin.figshare.com/ndownloader/files/22024524)
Supplement: Supplementary file [file 22024524]

**Supplementary Table 2.** The summary of mapping to reference genome.

| Sample   | NO. clean reads (million) | NO. mapped reads (million) | Mapped ratio |
|----------|---------------------------|----------------------------|--------------|
|          | 37.7                      | 25.9                       | 68.65%       |
| 2n-cell  | 43.8                      | 29.8                       | 68.05%       |
|          | 51.2                      | 45.6                       | 88.88%       |
|          | 41.2                      | 31.6                       | 76.75%       |
| 4n-cell  | 42.7                      | 32.7                       | 76.68%       |
|          | 41.9                      | 31.6                       | 75.44%       |
|          | 54.6                      | 50.9                       | 93.13%       |
| 2n-liver | 40.0                      | 37.3                       | 93.14%       |
|          | 35.2                      | 32.1                       | 91.30%       |
|          | 71.8                      | 65.9                       | 91.83%       |
| 4n-liver | 27.7                      | 25.7                       | 92.75%       |
|          | 48.1                      | 42.6                       | 88.55%       |
